# Supplementary material for: Melt- and fluid-inclusions studies in the Wunugetushan porphyry Cu–Mo deposit, NE China: Constraints on the separation of Cu and Mo
Source: Frontiers journal article supplement (doi:10.3389/feart.2023.1121856), 2023-02-02
Supplement: Table_2.XLS [file Table_2.XLS]

## Sheet: Sheet2
Supplementary Table 2. Compositions of melt inclusions hosted in quartz from quartz mozonite porphyry and dacite porphyry at Wugugetushan porphyry Cu-Mo deposit
Rock type	Host mineral	Na2O	MgO	Al2O3	SiO2	K2O	CaO	TiO2	MnO	FeOt	Li	B	Cr	Ni	Cu	Zn	Rb	Sr	Y	Zr	Nb	Mo	Ag	Sn	Sb	Cs	Ba	La	W	Au	Pb	Bi	Cu/Mo
		wt.%	wt.%	wt.%	wt.%	wt.%	wt.%	wt.%	wt.%	wt.%	ug/g	ug/g	µg/g	µg/g	µg/g	µg/g	µg/g	µg/g	µg/g	µg/g	µg/g	µg/g	µg/g	µg/g	µg/g	µg/g	µg/g	µg/g	µg/g	µg/g	µg/g	µg/g
quartz mozonite porphyry	quartz	0.187658	0.0731934	13.9951	73.6484	4.01241	0.344859	0.104295	0.05215	0.601663	12.1195	66.9997	62.5861	bld	8.70286	35.0886	78.9606	108.718	8.52385	69.1101	7.75728	1.66432	0.0882337	1.77391	bld	1.78958	1202.99	23.7707	0.643789	bld	24.3991	0.132406	5.22907
quartz mozonite porphyry	quartz	0.193736	0.0613081	13.9951	71.6818	4.01222	0.848566	0.0967131	0.0520682	0.589943	15.7519	69.5339	bld	bld	1.85292	36.4518	83.862	94.3053	10.3872	60.567	7.27479	1.74828	bld	bld	bld	2.43233	1182.07	39.2968	0.588628	bld	26.2569	0.153201	1.05985
quartz mozonite porphyry	quartz	0.196556	0.106835	13.9951	82.3997	3.86212	0.44725	0.129	0.0409828	0.677644	18.9814	64.0459	bld	bld	31.3226	45.1167	66.6844	147.033	6.90807	65.1293	5.87236	2.57989	bld	5.31897	bld	1.40687	1074.04	26.6469	0.623495	bld	17.3174	bld	12.141
quartz mozonite porphyry	quartz	0.231655	0.105157	13.9951	70.3052	3.78678	1.02957	0.115231	0.0499086	0.633851	8.6015	52.7359	226.687	bld	0.669825	39.4906	67.3588	205.825	7.45815	89.8002	6.00115	1.75007	bld	1.4603	0.30186	1.9971	1195.94	43.668	0.552402	bld	22.6508	0.0773912	0.382742
quartz mozonite porphyry	quartz	0.203327	0.10266	13.9951	80.5314	3.9091	0.754916	0.0961722	0.048326	0.709012	2.48332	70.4799	bld	bld	14	47.9058	73.5322	167.761	7.91649	72.4217	6.99883	1.93622	bld	bld	bld	2.09799	1182.29	23.8188	0.600598	bld	21.4582	bld	7.23059
quartz mozonite porphyry	quartz	0.181817	2.56292	13.9951	85.2512	5.04397	N/A	0.665317	0.0950835	3.16451	6.59352	36.6528	bld	bld	14.9578	134.272	89.0232	141.127	5.46686	59.3428	8.54571	1.93111	bld	5.05199	bld	1.47269	2069.28	27.0853	0.393361	bld	20.1673	bld	7.74572
dacite porphyry	quartz	0.145552	0.144509	13.9951	83.5796	5.33729	N/A	0.15455	0.0377395	0.906029	1.99068	67.2796	bld	bld	8.2	44.3388	88.332	67.0087	5.10442	93.7593	7.37092	1.4984	0.139759	bld	bld	2.21463	1209.27	0.393054	0.738284	bld	24.1168	bld	5.47249
dacite porphyry	quartz	0.429023	0.111323	13.9951	75.2216	4.40314	0.733034	0.121109	0.0427779	0.738345	3.28698	68.7165	bld	bld	20	36.206	71.339	174.57	6.16916	72.1662	6.55823	2.16745	bld	1.77715	bld	1.702	1165.12	23.7446	0.357284	bld	24.3683	bld	9.22742
dacite porphyry	quartz	0.167201	0.103167	13.9951	79.1548	3.94242	0.583368	0.110798	0.0406253	0.709657	17.6829	65.0242	bld	bld	22.2994	40.622	70.6681	145.328	4.2007	38.8897	5.96765	1.20414	bld	bld	bld	1.28509	1129.63	27.2348	0.328943	bld	24.1426	bld	18.519
dacite porphyry	quartz	0.485181	0.0962164	13.9951	81.5147	4.47374	0.831346	0.115913	0.0390895	0.627825	9.0971	56.2044	bld	bld	15.2293	28.6312	73.9116	158.927	8.18931	87.6402	6.60622	2.04122	bld	1.49136	bld	1.83103	1273.59	21.1435	0.445954	bld	20.6927	0.120797	7.46087
dacite porphyry	quartz	0.260903	0.100956	13.9951	75.1233	4.08969	0.661292	0.11503	0.0284361	0.550439	6.78751	34.5261	bld	bld	10.1	29.0995	73.7871	124.633	6.89508	65.0287	6.0139	1.76007	bld	2.49261	bld	1.57892	992.038	26.8096	0.393123	bld	20.1953	0.0725637	5.73841
dacite porphyry	quartz	0.179105	0.103836	13.9951	76.1066	3.92597	0.68159	0.11021	0.0588945	0.695894	7.97938	53.9878	bld	bld	8.5	30.5791	70.1689	127.193	7.08733	60.663	5.96403	0.967577	bld	bld	bld	1.62771	1173.03	28.1819	bld	bld	24.8723	bld	8.78483
N/A: not available; bld, below limit of detection
